# Supplementary material for: S-allylmercaptoglutathione Is a Substrate for Glutathione Reductase (E.C. 1.8.1.7) from Yeast (Saccharomyces cerevisiae)
Source: Antioxidants (Basel). 2018 Jul 6;7(7):86. doi: 10.3390/antiox7070086 (PMC6070820; doi:10.3390/antiox7070086)
Supplement: Supplementary file 1 [file antioxidants-07-00086-s001.pdf]

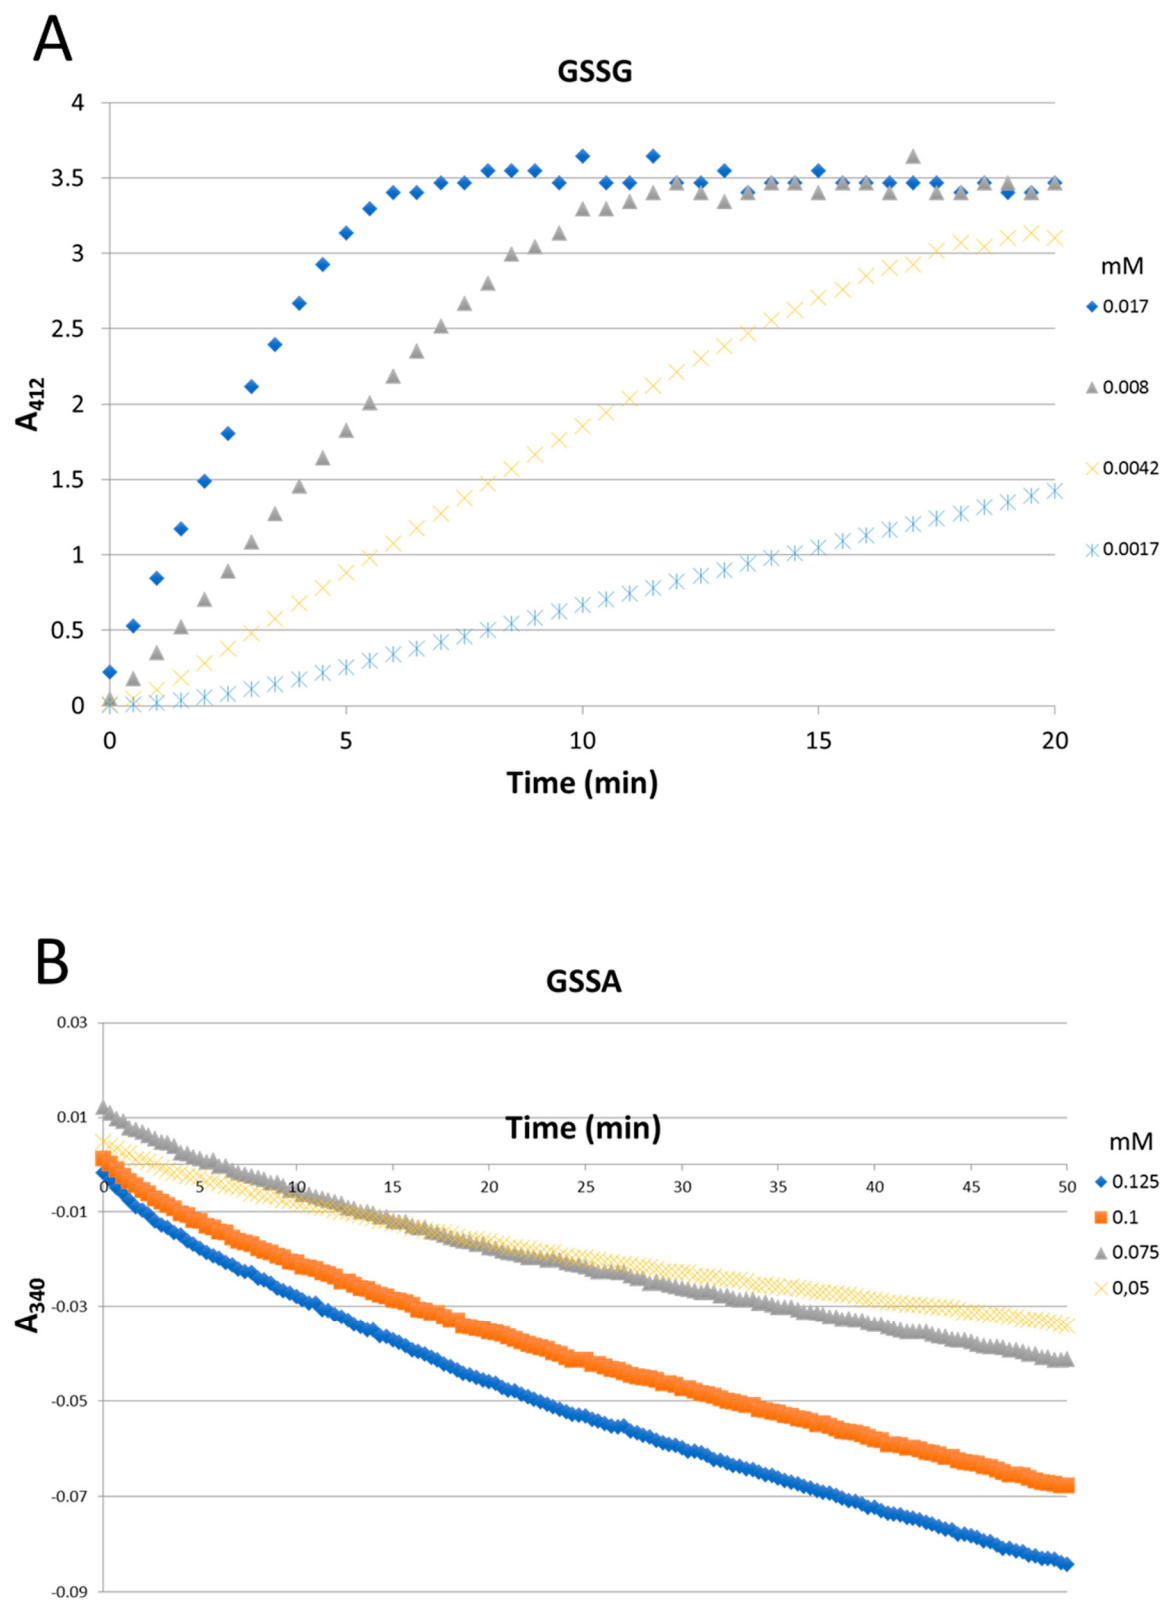

**Figure S1.** The kinetic measurements for the enzyme reactions of GR: **A**, with GSSG as substrate in the standard DTNB protocol (see M & M), and **B**, with GSSA as substrate without DTNB measuring NADPH consumption at  $A_{320}$ . The reagent blanks, in both cases without GR, were automatically subtracted from the test cuvette readings by the spectrophotometer program. The final substrate concentration in the reaction mix is indicated.

**Table S1.** The final substrate concentration in the assay mix is given. The gradients were calculated from linear regions of the plots in Figure S1A.

|              |       |       |        |        |
|--------------|-------|-------|--------|--------|
| S [GSSG] mM  | 0.017 | 0.008 | 0.0042 | 0.0017 |
| 1/S          | 60    | 120   | 240    | 600    |
| V = gradient | 0.62  | 0.36  | 0.190  | 0.078  |
| 1/V          | 1.62  | 2.78  | 5.25   | 12.88  |

Note: 1/Km: 14.08; Km: 0.071.

**Table S2.** The final substrate concentration in the assay mix is given. The gradients were calculated from linear regions of the plots in Figure S1B.

|              |          |          |          |          |
|--------------|----------|----------|----------|----------|
| S [GSSA] mM  | 0.125    | 0.10     | 0.75     | 0.50     |
| 1/S          | 8        | 10       | 13.3     | 20       |
| V = gradient | -0.00132 | -0.00112 | -0.00083 | -0.00060 |
| 1/V          | 758      | 894      | 1199     | 1662     |

Note: 1/Km: 2.00; Km: 0.50.
